# Supplementary material for: First molecular electronic hyperpolarizability of series of π-conjugated oxazole dyes in solution: an experimental and theoretical study
Source: Royal Society of Chemistry journal article supplement (doi:10.1039/c9ra05246a), 2019-01-01
Supplement: c9ra05246a1.pdf [file c9ra05246a1.pdf]

# First molecular electronic hyperpolarizability of series of $\pi$ -conjugated oxazole dyes in solution: an experimental and theoretical study

Luis M.G. Abegão<sup>a,b</sup>, Ruben D. Fonseca<sup>c,d</sup>, Francisco A. Santos<sup>a</sup>, José J. Rodrigues<sup>a</sup>, Cleber R. Mendonça<sup>c</sup>, Kenji Kamada<sup>e</sup>, Sandrine Piguel<sup>f</sup> and Leonardo De Boni<sup>c,\*</sup>

<sup>a</sup> Departamento de Física, Universidade Federal de Sergipe, 49100-000, São Cristovão, SE, Brazil

<sup>b</sup> Department of Radiology and Bioimaging, School of Medicine, Yale University, 300 Cedar Street, New Haven, Connecticut 06520, USA

<sup>c</sup> Instituto de Física de São Carlos, Universidade de São Paulo, CP 369, 13560-970 São Carlos, SP, Brazil

<sup>d</sup> Universidad popular del Cesar, Departamento de Física, Barrio Sabana, 2000004, Valledupar, Cesar, Colombia.

<sup>e</sup> National Institute of Advanced Industrial Science and Technology, Ikeda, Osaka 563-8577, Japan

<sup>f</sup> Institut Curie/CNRS, UMR 176, Bât. 110, Centre Universitaire, 91405 Orsay, France

\* Author to whom correspondence should be addressed.

## Supplementary Information

## Absorption e emission spectra

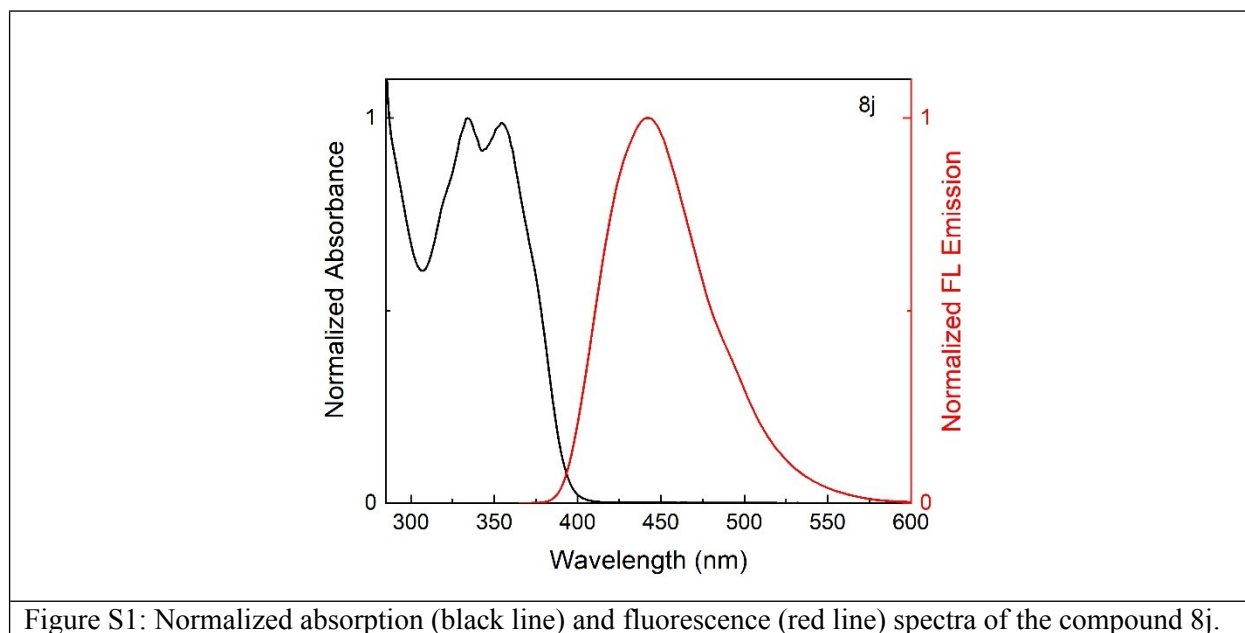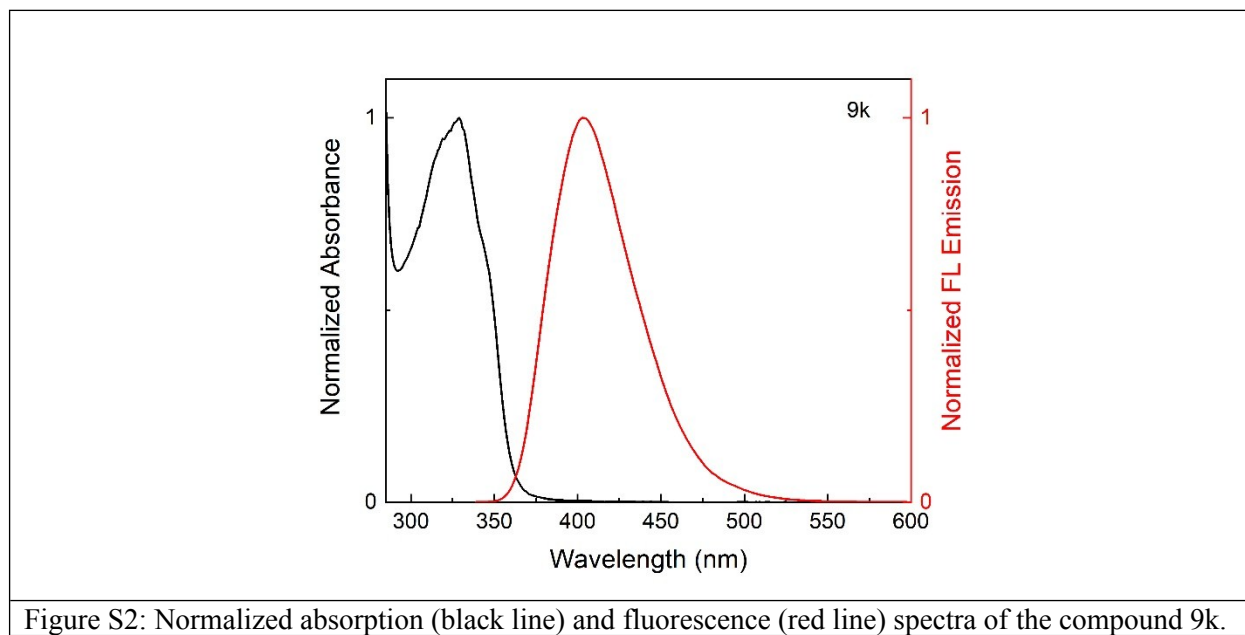

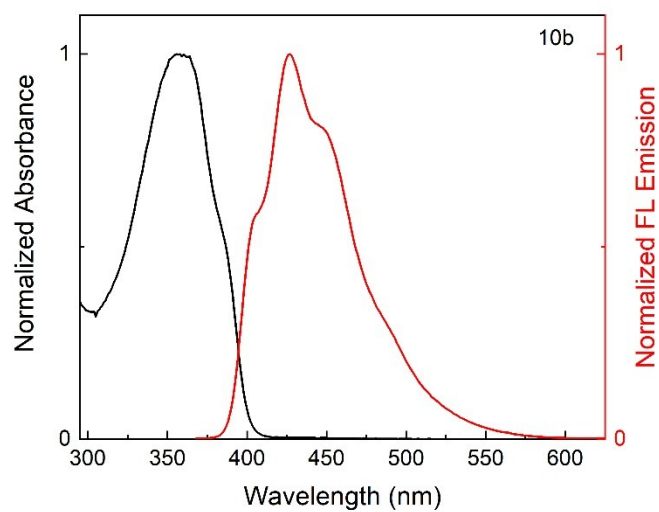

Figure S3: Normalized absorption (black line) and fluorescence (red line) spectra of the compound 10b.

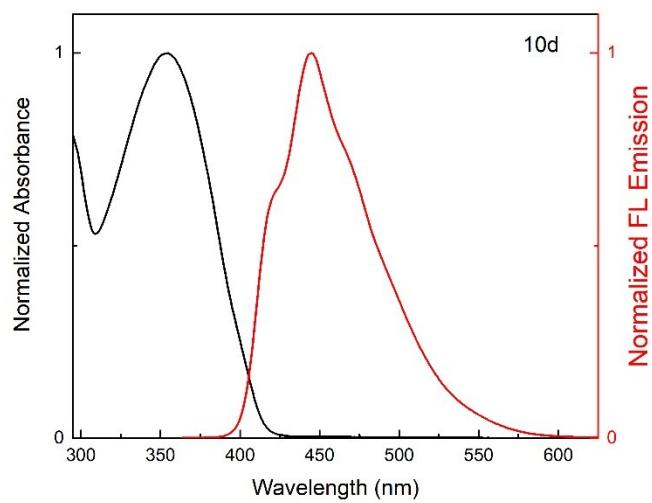

Figure S4: Normalized absorption (black line) and fluorescence (red line) spectra of the compound 10d.

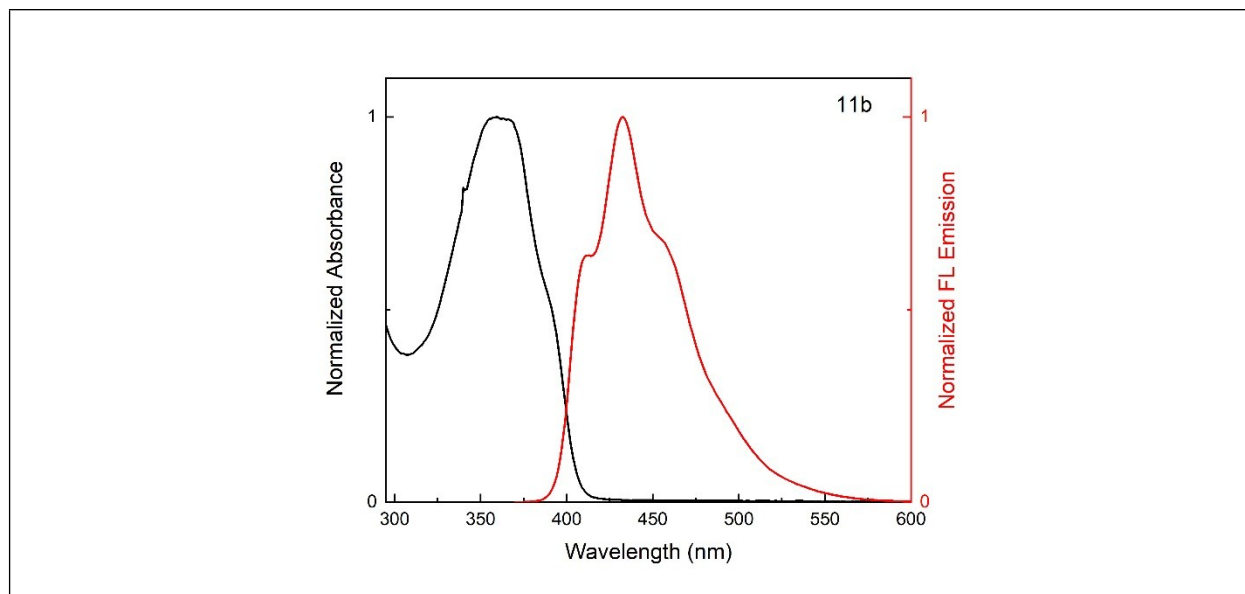

Figure S5: Normalized absorption (black line) and fluorescence (red line) spectra of the compound 11b.

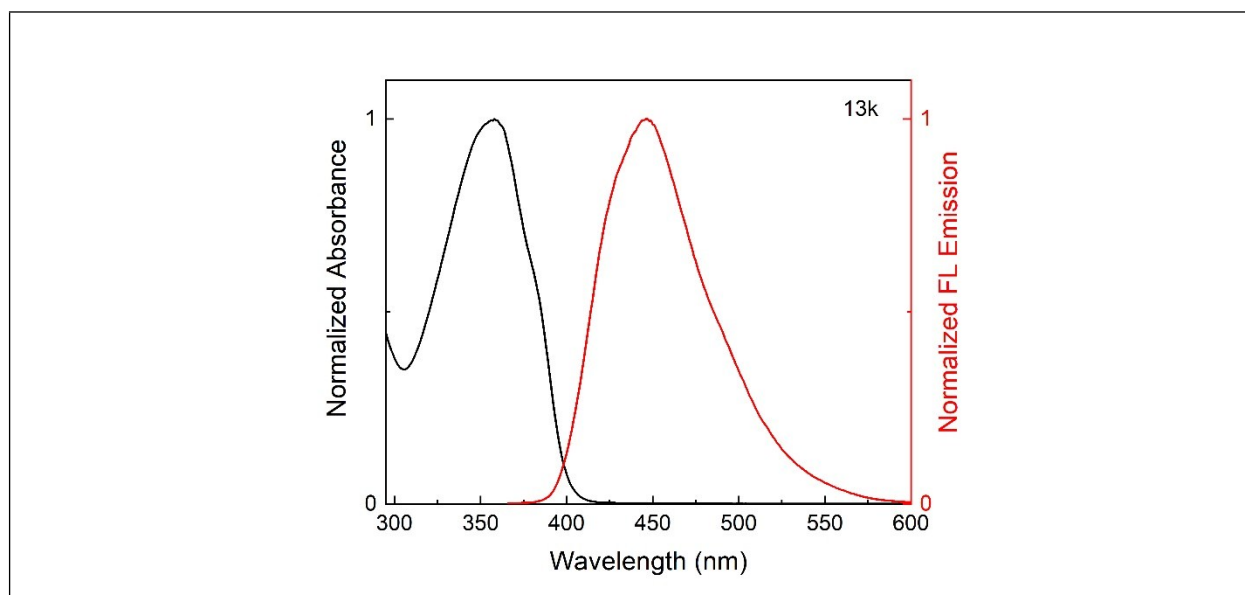

Figure S6: Normalized absorption (black line) and fluorescence (red line) spectra of the compound 13k.

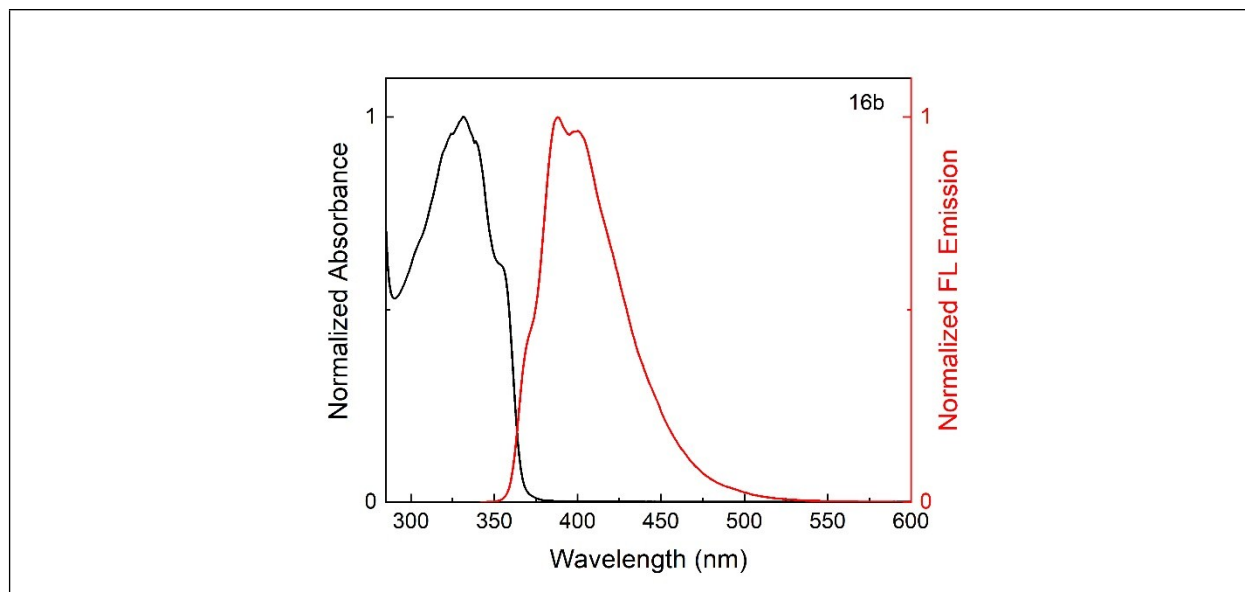

Figure S7: Normalized absorption (black line) and fluorescence (red line) spectra of the compound 16b.

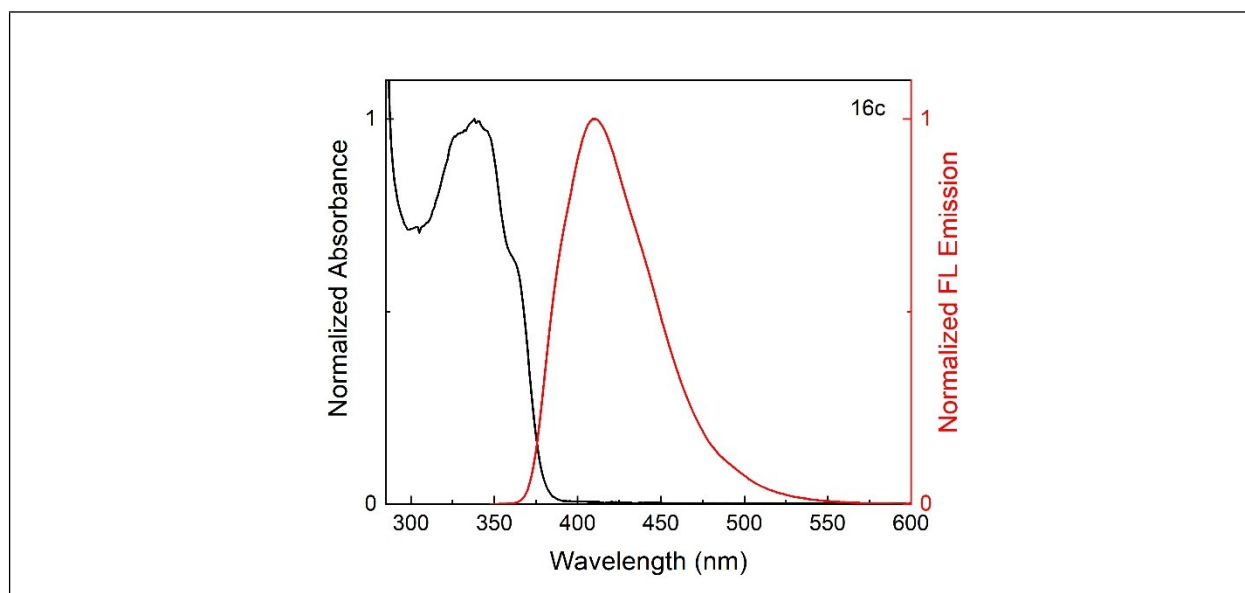

Figure S8: Normalized absorption (black line) and fluorescence (red line) spectra of the compound 16c.

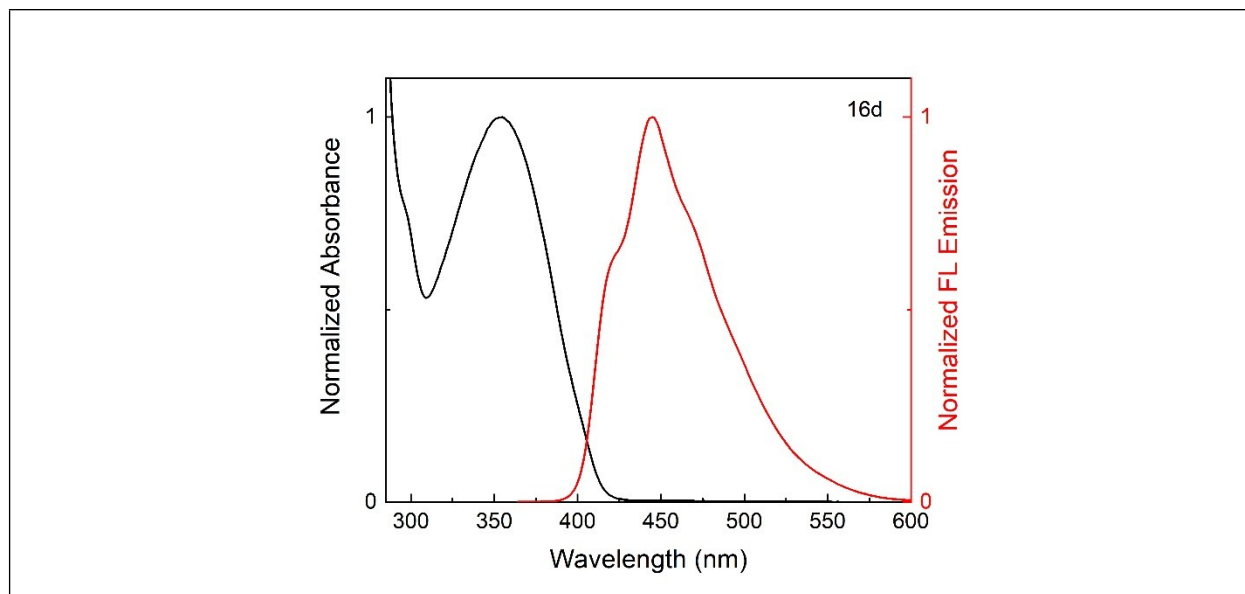

Figure S9: Normalized absorption (black line) and fluorescence (red line) spectra of the compound 16d.

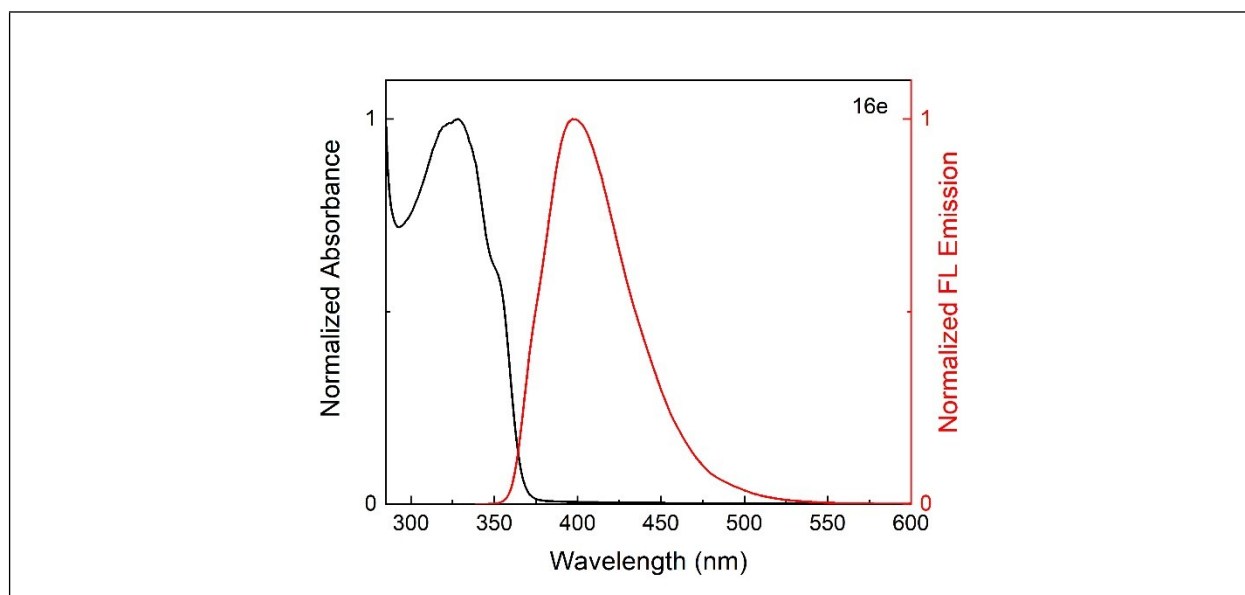

Figure S10: Normalized absorption (black line) and fluorescence (red line) spectra of the compound 16e.

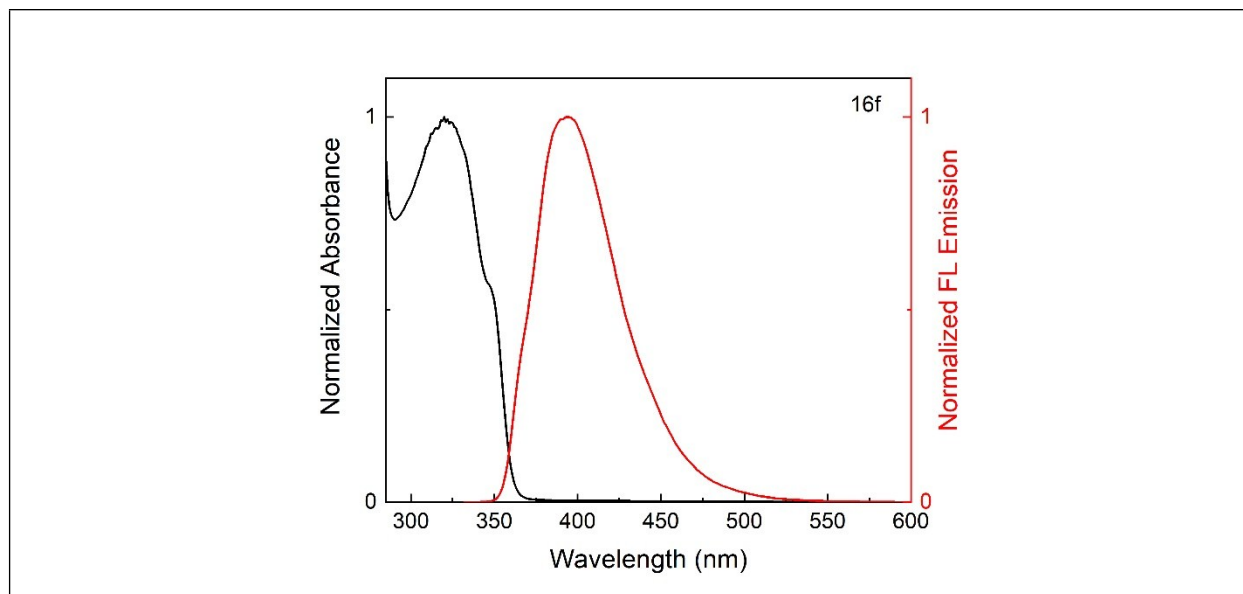

Figure S11: Normalized absorption (black line) and fluorescence (red line) spectra of the compound 16f.

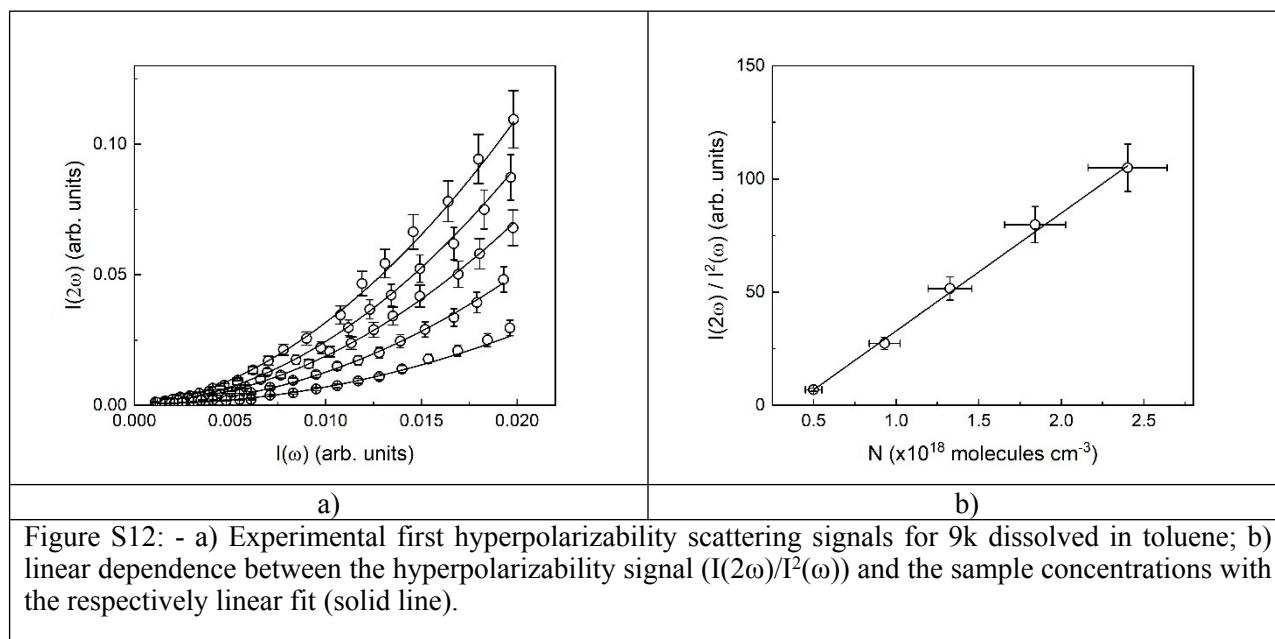

Figure S12: - a) Experimental first hyperpolarizability scattering signals for 9k dissolved in toluene; b) linear dependence between the hyperpolarizability signal ( $I(2\omega)/I^2(\omega)$ ) and the sample concentrations with the respectively linear fit (solid line).

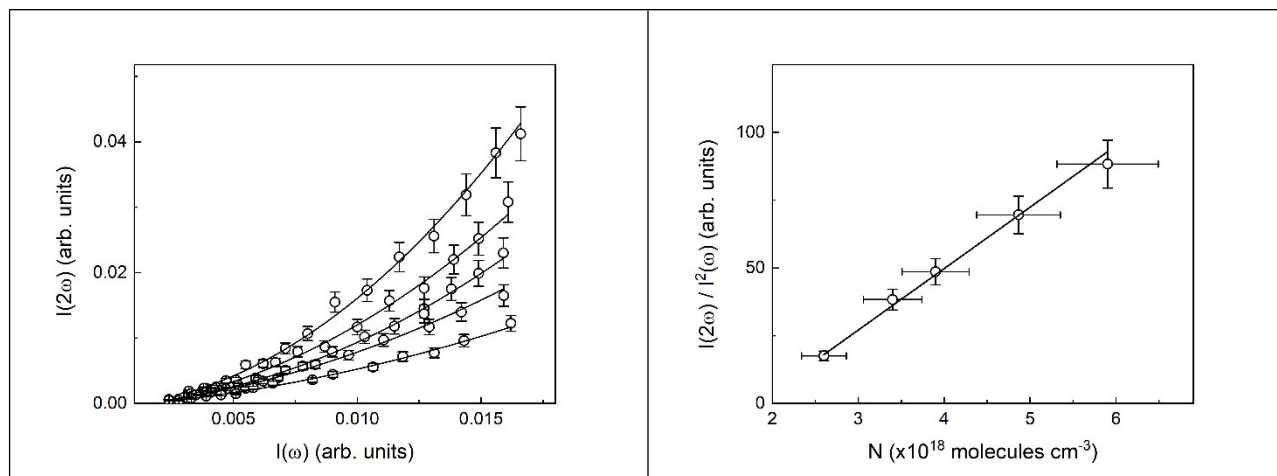

a)

b)

Figure S13: - a) Experimental first hyperpolarizability scattering signals for 10b dissolved in toluene; b) linear dependence between the hyperpolarizability signal ( $I(2\omega)/I^2(\omega)$ ) and the sample concentrations with the respectively linear fit (solid line).

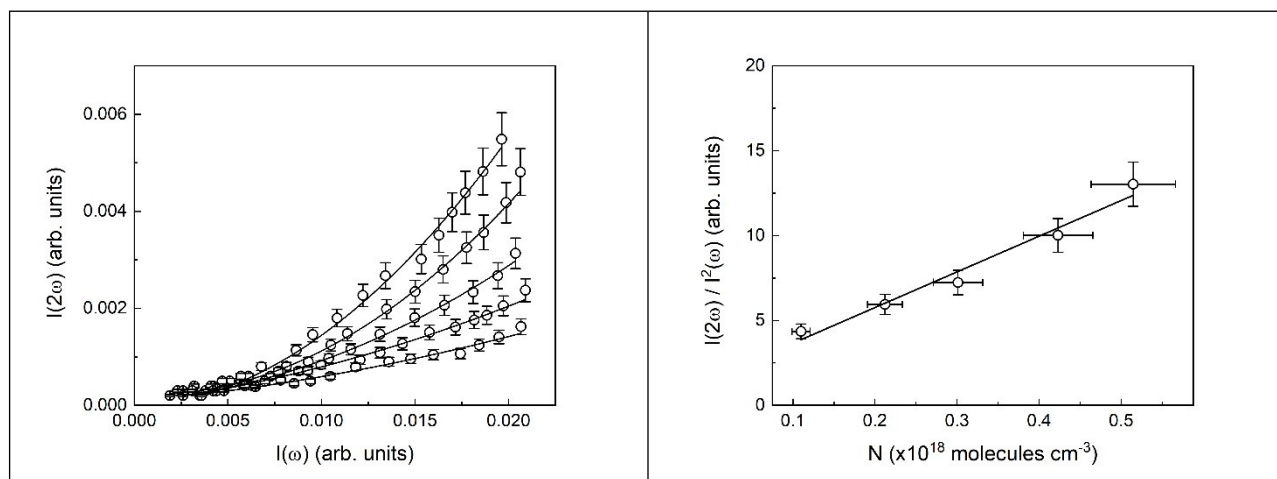

a)

b)

Figure S14: - a) Experimental first hyperpolarizability scattering signals for 10d dissolved in toluene; b) linear dependence between the hyperpolarizability signal ( $I(2\omega)/I^2(\omega)$ ) and the sample concentrations with the respectively linear fit (solid line).



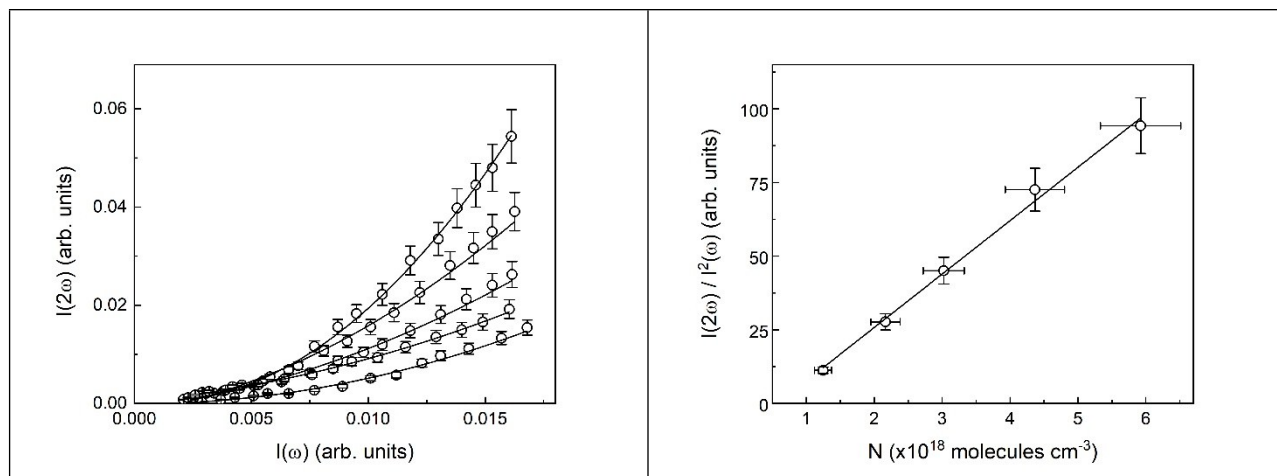

a)

b)

Figure S15: - a) Experimental first hyperpolarizability scattering signals for 11b dissolved in toluene; b) linear dependence between the hyperpolarizability signal ( $I(2\omega)/I^2(\omega)$ ) and the sample concentrations with the respectively linear fit (solid line).

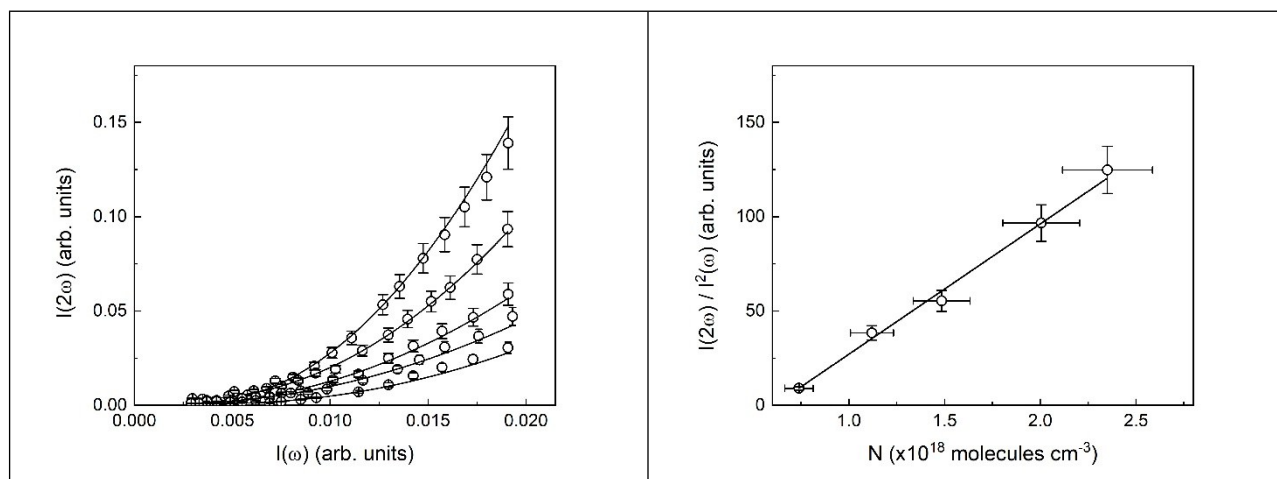

a)

b)

Figure S16: - a) Experimental first hyperpolarizability scattering signals for 13k dissolved in toluene; b) linear dependence between the hyperpolarizability signal ( $I(2\omega)/I^2(\omega)$ ) and the sample concentrations with the respectively linear fit (solid line).

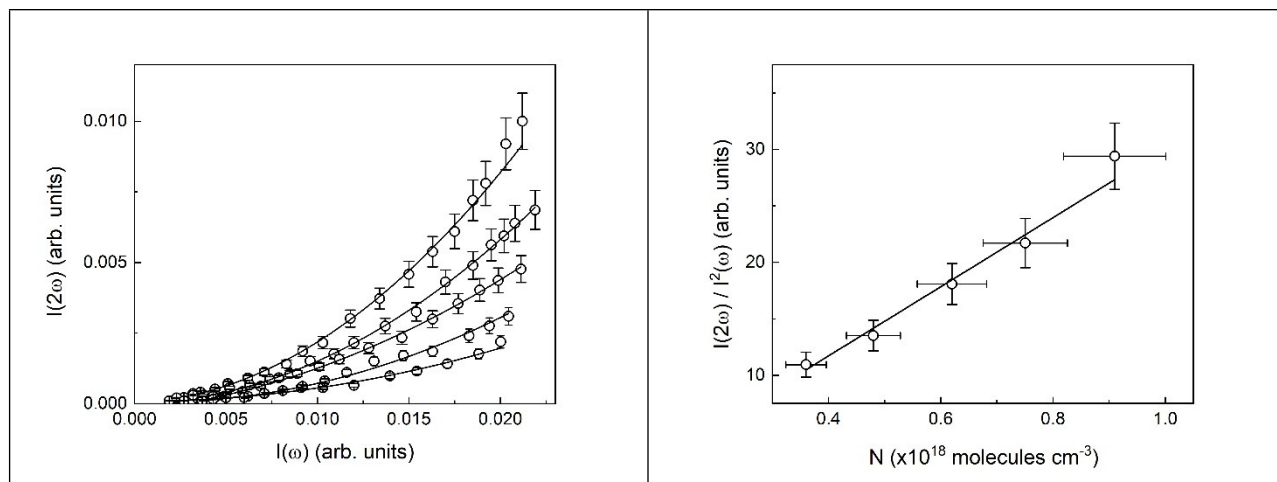

a)

b)

Figure S17: - a) Experimental first hyperpolarizability scattering signals for 16b dissolved in toluene; b) linear dependence between the hyperpolarizability signal ( $I(2\omega)/I^2(\omega)$ ) and the sample concentrations with the respectively linear fit (solid line).

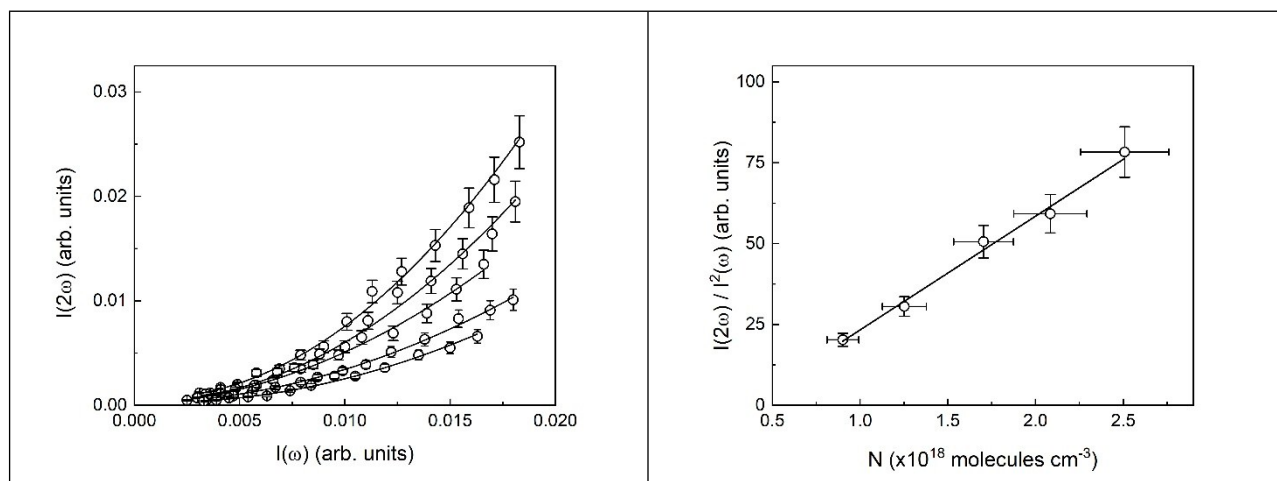

a)

b)

Figure S18: - a) Experimental first hyperpolarizability scattering signals for 16c dissolved in toluene; b) linear dependence between the hyperpolarizability signal ( $I(2\omega)/I^2(\omega)$ ) and the sample concentrations with the respectively linear fit (solid line).

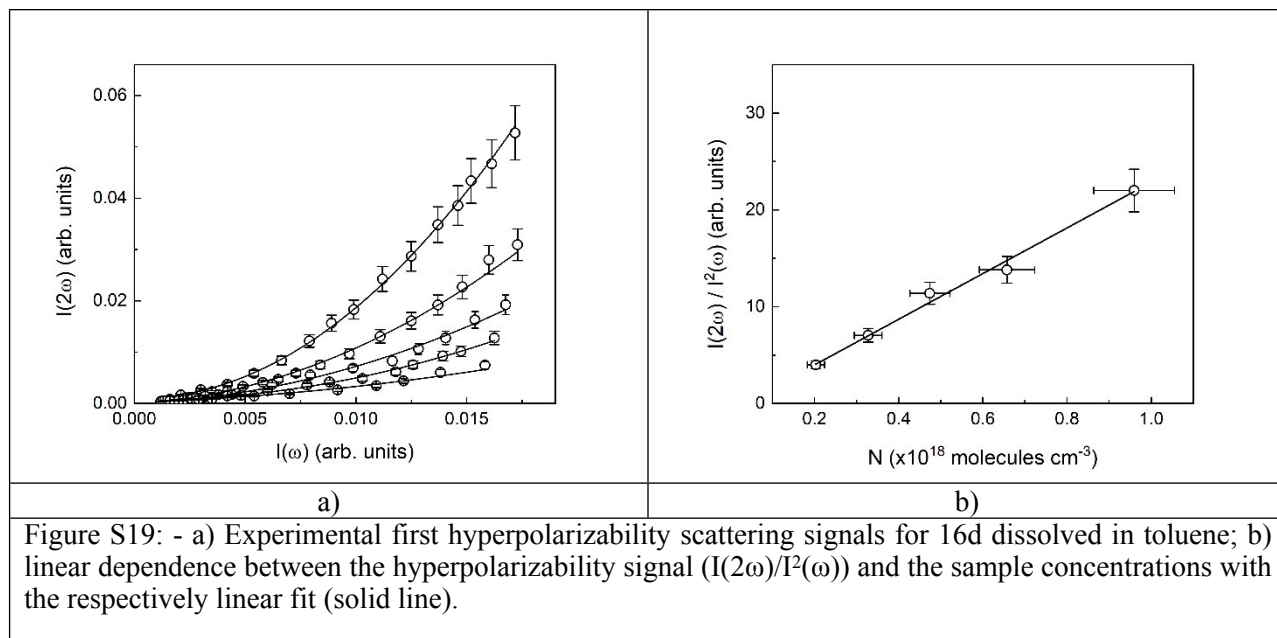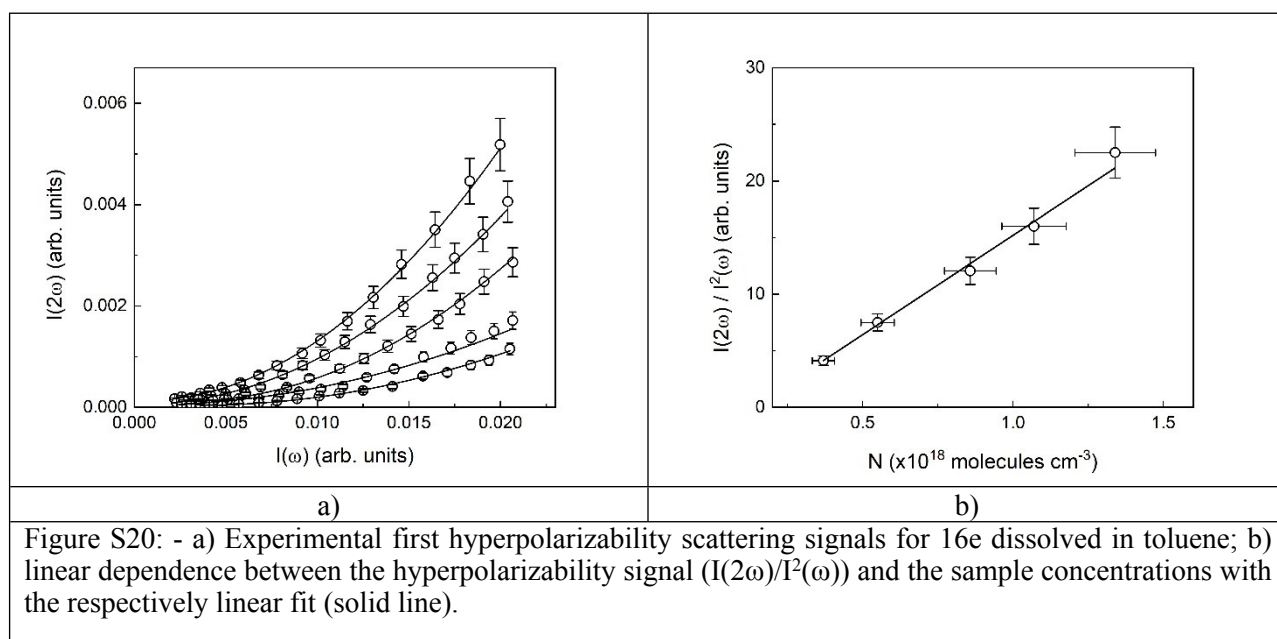

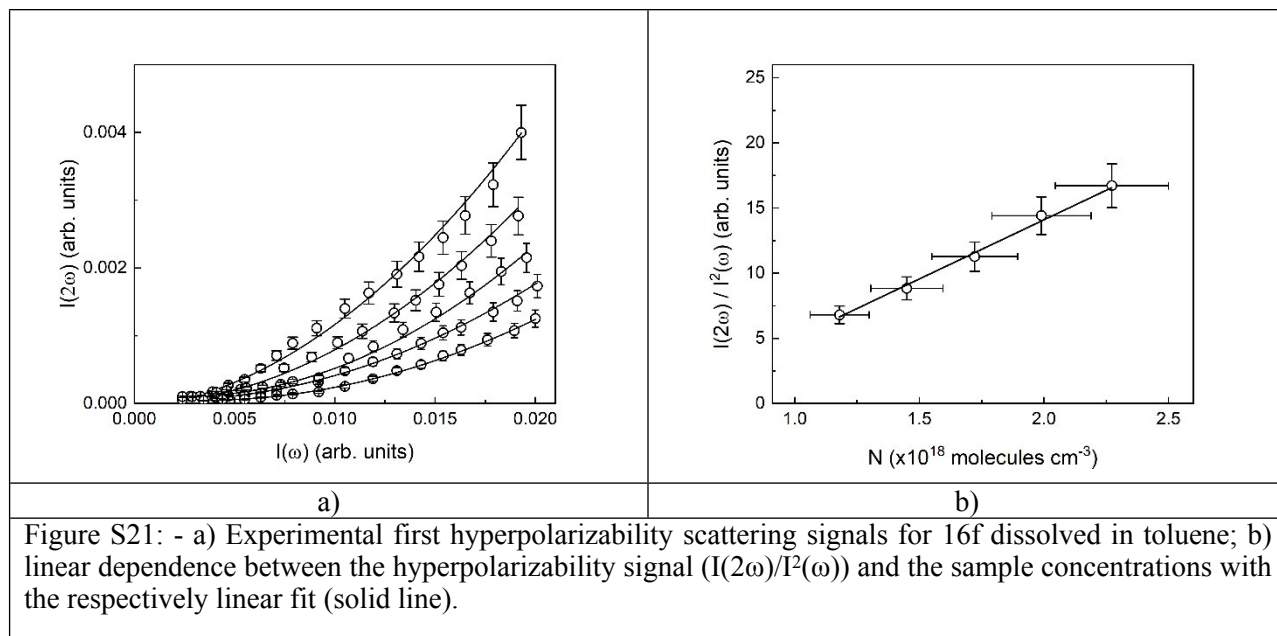

**Table S1. Optimized geometry in solvent (toluene) for compounds 8j and 9k used to perform the calculation of the static ( $\beta_0$ ) and dynamic ( $\beta_{\text{HRS}}$ ) first hyperpolarizability  $\beta$  (in  $10^{-30}$  cm<sup>4</sup> statvolt<sup>-1</sup>). The values below correspond to the functional B3LYP with the basis set 6-311+G(d,p).**

| Sample: 8j |          |          |          | Sample: 9k |          |          |          |
|------------|----------|----------|----------|------------|----------|----------|----------|
| C          | -3.12660 | -1.33378 | -0.06468 | C          | 5.20078  | -0.98391 | 0.08623  |
| C          | -4.34457 | -0.65643 | -0.10942 | C          | 6.41404  | -0.30918 | 0.10018  |
| O          | -5.56075 | -1.26561 | -0.11135 | N          | 6.52949  | 1.02562  | 0.07285  |
| C          | -5.61313 | -2.69038 | -0.09675 | H          | 7.34344  | -0.86989 | 0.13512  |
| H          | -6.67087 | -2.94545 | -0.11692 | C          | 5.39093  | 1.72641  | 0.02945  |
| H          | -5.15842 | -3.09653 | 0.81239  | C          | 4.12371  | 1.15316  | 0.01217  |
| H          | -5.12057 | -3.11444 | -0.97716 | H          | 5.49429  | 2.80749  | 0.00729  |
| C          | -4.37660 | 0.74951  | -0.15807 | C          | 4.00879  | -0.24378 | 0.04127  |
| O          | -5.56429 | 1.41569  | -0.28031 | H          | 3.24323  | 1.78109  | -0.02337 |
| C          | -6.28073 | 1.62484  | 0.94581  | H          | 5.18913  | -2.06668 | 0.10972  |
| H          | -7.19066 | 2.16088  | 0.67836  | C          | 2.71824  | -0.90460 | 0.02622  |
| H          | -5.68927 | 2.23150  | 1.63828  | C          | 2.30037  | -2.20443 | 0.04909  |
| H          | -6.54075 | 0.67070  | 1.41150  | N          | 0.92518  | -2.25351 | 0.01734  |
| C          | -3.16867 | 1.46612  | -0.15676 | H          | 2.89779  | -3.10115 | 0.08659  |
| O          | -3.28982 | 2.81969  | -0.19677 | C          | 0.53959  | -1.00619 | -0.02382 |
| C          | -2.10408 | 3.61011  | -0.22737 | O          | 1.58071  | -0.12909 | -0.02090 |
| H          | -2.44183 | 4.64386  | -0.26900 | C          | -0.81875 | -0.48259 | -0.06900 |
| H          | -1.50201 | 3.38863  | -1.11402 | C          | -1.88432 | -1.39024 | -0.07350 |
| H          | -1.50202 | 3.46004  | 0.67440  | C          | -3.19275 | -0.91217 | -0.11868 |
| C          | -1.94686 | 0.78943  | -0.11615 | H          | -1.67007 | -2.44801 | -0.04735 |
| C          | -1.92553 | -0.60963 | -0.07023 | O          | -4.29727 | -1.70499 | -0.13675 |
| H          | -1.01510 | 1.33407  | -0.11790 | C          | -4.11850 | -3.12086 | -0.14545 |
| H          | -3.10499 | -2.41321 | -0.03003 | H          | -5.12103 | -3.54270 | -0.18052 |
| C          | -0.65960 | -1.32437 | -0.02887 | H          | -3.60962 | -3.46239 | 0.76104  |
| C          | -0.29337 | -2.64068 | 0.00958  | H          | -3.55605 | -3.44266 | -1.02692 |
| N          | 1.08133  | -2.74372 | 0.03608  | C          | -3.44299 | 0.47285  | -0.15296 |
| H          | -0.92367 | -3.51477 | 0.01878  | O          | -4.71708 | 0.94985  | -0.26984 |
| C          | 1.51484  | -1.51543 | 0.01366  | C          | -5.48447 | 0.97293  | 0.94396  |
| O          | 0.50853  | -0.59571 | -0.02611 | H          | -6.46138 | 1.37350  | 0.67640  |
| C          | 2.88960  | -1.04533 | 0.02549  | H          | -5.01149 | 1.62635  | 1.68331  |
| C          | 3.95087  | -2.00068 | 0.05820  | H          | -5.59910 | -0.03463 | 1.35068  |
| N          | 5.22206  | -1.68495 | 0.07089  | C          | -2.36269 | 1.37342  | -0.14589 |
| H          | 3.70005  | -3.05667 | 0.07336  | O          | -2.69684 | 2.69019  | -0.17895 |
| C          | 5.56456  | -0.36081 | 0.05196  | C          | -1.65134 | 3.65883  | -0.21084 |
| C          | 4.58129  | 0.67594  | 0.01914  | H          | -2.14902 | 4.62571  | -0.25314 |
| C          | 3.22115  | 0.29419  | 0.00613  | H          | -1.02219 | 3.53483  | -1.09769 |
| H          | 2.44987  | 1.05537  | -0.01871 | H          | -1.03238 | 3.60780  | 0.69064  |
| C          | 6.93600  | -0.00977 | 0.06530  | C          | -1.05070 | 0.89698  | -0.10683 |
| C          | 7.31543  | 1.31291  | 0.04711  | H          | -0.21425 | 1.57905  | -0.10126 |
| H          | 7.66601  | -0.81000 | 0.08998  |            |          |          |          |
| C          | 6.34320  | 2.34122  | 0.01482  |            |          |          |          |
| H          | 8.36745  | 1.57424  | 0.05743  |            |          |          |          |
| C          | 5.00402  | 2.03089  | 0.00107  |            |          |          |          |
| H          | 6.66107  | 3.37738  | 0.00082  |            |          |          |          |
| H          | 4.25519  | 2.81553  | -0.02375 |            |          |          |          |

**Table S2. Optimized geometry in solvent (toluene) for compounds 10b and 10d used to perform the calculation of the static ( $\beta_0$ ) and dynamic ( $\beta_{\text{HRS}}$ ) first hyperpolarizability  $\beta$  (in  $10^{-30}$  cm<sup>4</sup> statvolt<sup>-1</sup>). The values below correspond to the functional B3LYP with the basis set 6-311+G(d,p).**

| Sample: 10b |          |          |          | Sample: 10d |          |          |          |
|-------------|----------|----------|----------|-------------|----------|----------|----------|
| H           | 3.22586  | 1.70926  | 0.01009  | H           | 7.50645  | 1.87339  | 0.86227  |
| C           | 4.27022  | 1.42405  | 0.01744  | C           | 6.60283  | 1.32200  | 0.62952  |
| C           | 5.25907  | 2.40356  | 0.03869  | C           | 6.67821  | -0.01393 | 0.23037  |
| H           | 4.97437  | 3.44970  | 0.04808  | H           | 7.64206  | -0.50400 | 0.15267  |
| C           | 6.60667  | 2.04692  | 0.04780  | C           | 5.52183  | -0.72416 | -0.06787 |
| H           | 7.37466  | 2.81150  | 0.06427  | H           | 5.59601  | -1.76100 | -0.37445 |
| C           | 6.95974  | 0.69595  | 0.03598  | C           | 4.26156  | -0.10836 | 0.02649  |
| H           | 8.00482  | 0.40772  | 0.04375  | C           | 3.05598  | -0.85658 | -0.28974 |
| C           | 5.97802  | -0.28701 | 0.01530  | C           | 2.79173  | -2.12577 | -0.72349 |
| H           | 6.26878  | -1.33110 | 0.00808  | H           | 3.48841  | -2.91774 | -0.94574 |
| C           | 4.61620  | 0.06298  | 0.00490  | N           | 1.43193  | -2.30124 | -0.85837 |
| C           | 3.59499  | -0.97085 | -0.01812 | C           | 0.90366  | -1.15600 | -0.51211 |
| C           | 3.60437  | -2.33704 | -0.04939 | C           | -0.49618 | -0.81870 | -0.47938 |
| N           | 2.31265  | -2.81581 | -0.05818 | H           | -1.14242 | -1.62984 | -0.78729 |
| C           | 1.55272  | -1.75030 | -0.03308 | C           | -0.97495 | 0.39739  | -0.14625 |
| C           | 0.11587  | -1.70616 | -0.02867 | H           | -0.24544 | 1.17274  | 0.07278  |
| H           | -0.34628 | -2.68603 | -0.04319 | C           | -2.36634 | 0.85827  | -0.13726 |
| C           | -0.61501 | -0.57161 | -0.01013 | C           | -2.57153 | 2.19524  | -0.45630 |
| C           | -2.06944 | -0.45929 | -0.00007 | H           | -1.70865 | 2.82591  | -0.64202 |
| C           | -2.64073 | 0.83209  | -0.02278 | C           | -3.86002 | 2.74413  | -0.59407 |
| H           | -1.98003 | 1.68865  | -0.04780 | H           | -3.97044 | 3.78637  | -0.87045 |
| C           | -4.01521 | 1.02363  | -0.01598 | C           | -4.96644 | 1.95550  | -0.39317 |
| O           | -4.63223 | 2.23584  | -0.03923 | H           | -5.96480 | 2.36266  | -0.51243 |
| C           | -3.82310 | 3.40761  | -0.06897 | C           | -4.82317 | 0.59905  | -0.00211 |
| H           | -3.18870 | 3.47614  | 0.82078  | C           | -3.51297 | 0.03440  | 0.15549  |
| H           | -3.19917 | 3.43822  | -0.96818 | C           | -3.42383 | -1.29456 | 0.65046  |
| H           | -4.51832 | 4.24487  | -0.08264 | H           | -2.45355 | -1.72351 | 0.85462  |
| C           | -4.87397 | -0.10293 | 0.01838  | C           | -4.55093 | -2.03928 | 0.91444  |
| O           | -6.20412 | 0.16346  | 0.02749  | H           | -4.44953 | -3.04724 | 1.30065  |
| C           | -7.11716 | -0.93071 | 0.06595  | C           | -5.83737 | -1.49780 | 0.70087  |
| H           | -7.00763 | -1.57044 | -0.81537 | H           | -6.71745 | -2.09764 | 0.90286  |
| H           | -6.98271 | -1.52785 | 0.97329  | C           | -5.96543 | -0.20248 | 0.26286  |
| H           | -8.10982 | -0.48479 | 0.06907  | H           | -6.94803 | 0.23630  | 0.12446  |
| C           | -4.31463 | -1.38035 | 0.04188  | O           | 1.83886  | -0.22899 | -0.15301 |
| H           | -4.95640 | -2.25041 | 0.06933  | C           | 4.19488  | 1.23526  | 0.42929  |
| C           | -2.93306 | -1.55859 | 0.03275  | H           | 3.23124  | 1.72238  | 0.50700  |
| H           | -2.54074 | -2.56761 | 0.05519  | C           | 5.35732  | 1.94047  | 0.72712  |
| H           | -0.07780 | 0.37296  | -0.00306 | H           | 5.28875  | 2.97721  | 1.03677  |
| O           | 2.27187  | -0.58931 | -0.00810 |             |          |          |          |
| H           | 4.45297  | -3.00158 | -0.06694 |             |          |          |          |

**Table S3. Optimized geometry in solvent (toluene) for compounds 11b and 13k used to perform the calculation of the static ( $\beta_0$ ) and dynamic ( $\beta_{\text{HRS}}$ ) first hyperpolarizability  $\beta$  (in  $10^{-30}$  cm<sup>4</sup> statvolt<sup>-1</sup>). The values below correspond to the functional B3LYP with the basis set 6-311+G(d,p).**

| Sample: 11b |          |          |          | Sample: 13k |          |          |          |
|-------------|----------|----------|----------|-------------|----------|----------|----------|
| C           | 5.94430  | 1.31442  | 0.03679  | C           | 7.46385  | 0.64023  | 0.12111  |
| C           | 4.61483  | 1.75585  | 0.03015  | N           | 7.22342  | 1.95712  | 0.18463  |
| C           | 3.57344  | 0.84332  | 0.02498  | C           | 5.94017  | 2.33493  | 0.17633  |
| H           | 4.42046  | 2.82170  | 0.02922  | C           | 4.86867  | 1.45106  | 0.10621  |
| C           | 3.82360  | -0.54159 | 0.02621  | H           | 5.75501  | 3.40396  | 0.22833  |
| H           | 2.55194  | 1.20182  | 0.02019  | C           | 5.12611  | 0.07425  | 0.03933  |
| C           | 5.15824  | -0.96874 | 0.03202  | H           | 3.85365  | 1.82587  | 0.10293  |
| C           | 6.21155  | -0.05943 | 0.03773  | C           | 6.47112  | -0.32767 | 0.04868  |
| H           | 5.38779  | -2.02802 | 0.03090  | H           | 6.74508  | -1.37451 | 0.00172  |
| H           | 7.22717  | -0.43092 | 0.04169  | H           | 8.50838  | 0.34302  | 0.12918  |
| O           | 6.89717  | 2.28722  | 0.04152  | C           | 4.05364  | -0.89802 | -0.03682 |
| C           | 8.27002  | 1.90156  | 0.04764  | C           | 3.99062  | -2.26013 | -0.13017 |
| H           | 8.51490  | 1.32191  | 0.94315  | N           | 2.67720  | -2.66573 | -0.17093 |
| H           | 8.83806  | 2.82975  | 0.05091  | H           | 4.80327  | -2.96754 | -0.17125 |
| H           | 8.52319  | 1.32317  | -0.84637 | C           | 1.97593  | -1.56086 | -0.10276 |
| C           | 2.73721  | -1.50524 | 0.02163  | O           | 2.75383  | -0.44467 | -0.01989 |
| C           | 2.65199  | -2.86996 | 0.04173  | C           | 0.54300  | -1.44091 | -0.10654 |
| N           | 1.32959  | -3.25760 | 0.02257  | C           | -0.12256 | -0.26985 | -0.03422 |
| H           | 3.45205  | -3.59187 | 0.06938  | H           | 0.03104  | -2.39308 | -0.17439 |
| C           | 0.64579  | -2.14338 | -0.00793 | C           | -1.56898 | -0.07423 | -0.02985 |
| O           | 1.44467  | -1.03380 | -0.00980 | H           | 0.46316  | 0.64271  | 0.02812  |
| C           | -0.78441 | -1.99844 | -0.03864 | C           | -2.48570 | -1.14242 | -0.07899 |
| C           | -1.43408 | -0.81670 | -0.06694 | C           | -3.85437 | -0.89981 | -0.06631 |
| H           | -1.31348 | -2.94395 | -0.03709 | H           | -2.12356 | -2.15909 | -0.12844 |
| C           | -2.87956 | -0.60713 | -0.10041 | C           | -4.34375 | 0.42633  | 0.00763  |
| H           | -0.83432 | 0.08919  | -0.06440 | C           | -3.43110 | 1.48574  | 0.03801  |
| C           | -3.81510 | -1.65142 | -0.12895 | C           | -2.05963 | 1.23531  | 0.02163  |
| C           | -5.17597 | -1.37107 | -0.15376 | H           | -1.38224 | 2.08022  | 0.06121  |
| H           | -3.48988 | -2.68421 | -0.13054 | O           | -4.80939 | -1.86775 | -0.11622 |
| C           | -5.64694 | -0.06073 | -0.15529 | C           | -4.39807 | -3.23101 | -0.20187 |
| H           | -5.90690 | -2.17095 | -0.17950 | H           | -5.31658 | -3.81335 | -0.23868 |
| C           | -4.72018 | 1.00353  | -0.14349 | H           | -3.81417 | -3.52507 | 0.67585  |
| C           | -3.35688 | 0.71824  | -0.10929 | H           | -3.81574 | -3.41172 | -1.11042 |
| H           | -2.63755 | 1.52678  | -0.10020 | O           | -5.68576 | 0.68790  | -0.00973 |
| O           | -6.99702 | 0.15727  | -0.25224 | C           | -6.39727 | 0.38847  | 1.20465  |
| C           | -7.63152 | 0.75837  | 0.88792  | H           | -6.34698 | -0.67804 | 1.43141  |
| H           | -8.69010 | 0.82627  | 0.64055  | H           | -5.99040 | 0.97218  | 2.03544  |
| H           | -7.23268 | 1.75532  | 1.08159  | H           | -7.43163 | 0.67842  | 1.02529  |
| H           | -7.50299 | 0.12438  | 1.77133  | O           | -3.86212 | 2.78402  | 0.15321  |
| O           | -5.24389 | 2.26114  | -0.18218 | C           | -4.50780 | 3.33393  | -1.00730 |
| C           | -4.35196 | 3.37311  | -0.21357 | H           | -4.77836 | 4.35588  | -0.74477 |
| H           | -4.98505 | 4.25713  | -0.25974 | H           | -5.40414 | 2.76640  | -1.26298 |
| H           | -3.70876 | 3.33981  | -1.09830 | H           | -3.81594 | 3.34608  | -1.85588 |
| H           | -3.73476 | 3.41375  | 0.68954  |             |          |          |          |

**Table S4. Optimized geometry in solvent (toluene) for compounds 16b and 16c used to perform the calculation of the static ( $\beta_0$ ) and dynamic ( $\beta_{\text{HRS}}$ ) first hyperpolarizability  $\beta$  (in  $10^{-30}$  cm<sup>4</sup> statvolt<sup>-1</sup>). The values below correspond to the functional B3LYP with the basis set 6-311+G(d,p).**

| Sample: 16b |          |          |          | Sample: 16c |          |          |          |
|-------------|----------|----------|----------|-------------|----------|----------|----------|
| C           | -7.27109 | 0.34903  | 0.01241  | C           | -6.62859 | 0.25116  | 0.00731  |
| C           | -7.08988 | 1.73334  | -0.00176 | C           | -6.52822 | 1.64352  | 0.00111  |
| C           | -6.17322 | -0.50273 | 0.01347  | C           | -5.26977 | 2.24364  | -0.00549 |
| H           | -8.27177 | -0.06774 | 0.02307  | H           | -7.42375 | 2.25398  | 0.00152  |
| C           | -4.86748 | 0.01731  | -0.00017 | C           | -4.11765 | 1.46319  | -0.00604 |
| H           | -6.32933 | -1.57511 | 0.02542  | H           | -5.18335 | 3.32417  | -0.01028 |
| C           | -4.69367 | 1.41053  | -0.01423 | C           | -4.21048 | 0.06236  | 0.00010  |
| C           | -5.79811 | 2.25756  | -0.01496 | H           | -3.14330 | 1.93500  | -0.01137 |
| H           | -3.69310 | 1.82376  | -0.02476 | C           | -5.48265 | -0.53466 | 0.00693  |
| H           | -5.64797 | 3.33119  | -0.02592 | H           | -5.57593 | -1.61423 | 0.01227  |
| H           | -7.94802 | 2.39542  | -0.00236 | H           | -7.60308 | -0.22339 | 0.01268  |
| C           | -3.72278 | -0.87997 | 0.00021  | C           | -3.01556 | -0.76677 | -0.00072 |
| C           | -3.56009 | -2.23834 | 0.00099  | C           | -2.77597 | -2.11633 | -0.00233 |
| N           | -2.21975 | -2.55221 | 0.00039  | N           | -1.42204 | -2.35130 | -0.00293 |
| H           | -4.31696 | -3.00586 | 0.00144  | H           | -3.48731 | -2.92612 | -0.00354 |
| C           | -1.60351 | -1.39937 | -0.00094 | C           | -0.87385 | -1.16521 | -0.00144 |
| O           | -2.46332 | -0.33343 | -0.00114 | O           | -1.79200 | -0.15053 | -0.00039 |
| C           | -0.22539 | -1.13623 | -0.00145 | C           | 0.48809  | -0.82760 | -0.00106 |
| C           | 0.96534  | -0.91329 | -0.00152 | C           | 1.66415  | -0.54187 | -0.00064 |
| C           | 2.35939  | -0.65267 | -0.00135 | C           | 3.04325  | -0.21097 | -0.00016 |
| C           | 3.28474  | -1.70077 | -0.00405 | C           | 4.01939  | -1.22619 | -0.00146 |
| C           | 4.65205  | -1.42868 | -0.00367 | C           | 5.36663  | -0.90345 | -0.00096 |
| H           | 2.93824  | -2.72625 | -0.00644 | H           | 3.70933  | -2.26337 | -0.00286 |
| C           | 5.11972  | -0.11641 | -0.00055 | C           | 5.76564  | 0.44244  | 0.00087  |
| H           | 5.35132  | -2.25331 | -0.00584 | H           | 6.11437  | -1.68644 | -0.00195 |
| C           | 4.18712  | 0.95532  | 0.00222  | C           | 4.79923  | 1.46068  | 0.00218  |
| C           | 2.82855  | 0.68080  | 0.00175  | C           | 3.45241  | 1.13663  | 0.00166  |
| H           | 2.10770  | 1.48578  | 0.00379  | H           | 5.11027  | 2.49771  | 0.00361  |
| O           | 6.42605  | 0.24071  | 0.00015  | H           | 2.70591  | 1.92066  | 0.00268  |
| C           | 7.41517  | -0.78726 | -0.00275 | C           | 7.15554  | 0.77615  | 0.00143  |
| H           | 8.37328  | -0.27163 | -0.00186 | N           | 8.27965  | 1.04644  | 0.00189  |
| H           | 7.33649  | -1.41009 | -0.89912 |             |          |          |          |
| H           | 7.33721  | -1.41446 | 0.89064  |             |          |          |          |
| O           | 4.72506  | 2.20234  | 0.00517  |             |          |          |          |
| C           | 3.84201  | 3.32140  | 0.00898  |             |          |          |          |
| H           | 4.48280  | 4.20089  | 0.01158  |             |          |          |          |
| H           | 3.21169  | 3.32643  | 0.90394  |             |          |          |          |
| H           | 3.21113  | 3.33212  | -0.88553 |             |          |          |          |



**Table S5. Optimized geometry in solvent (toluene) for compounds 16d and 16e used to perform the calculation of the static ( $\beta_0$ ) and dynamic ( $\beta_{\text{HRS}}$ ) first hyperpolarizability  $\beta$  (in  $10^{-30}$  cm<sup>4</sup> statvolt<sup>-1</sup>). The values below correspond to the functional B3LYP with the basis set 6-311+G(d,p).**

| Sample: 16d |          |          |          | Sample: 16e |          |          |          |
|-------------|----------|----------|----------|-------------|----------|----------|----------|
| C           | -6.65893 | 0.45572  | 0.00061  | C           | 7.56503  | 0.36203  | 0.04572  |
| C           | -6.42047 | 1.83140  | 0.00032  | C           | 7.42493  | 1.75063  | 0.01388  |
| C           | -5.10832 | 2.30241  | -0.00010 | C           | 6.15001  | 2.31380  | -0.02186 |
| H           | -7.25065 | 2.52820  | 0.00044  | H           | 8.30246  | 2.38672  | 0.01723  |
| C           | -4.03981 | 1.41066  | -0.00024 | C           | 5.02080  | 1.50045  | -0.02609 |
| H           | -4.91422 | 3.36897  | -0.00033 | H           | 6.03269  | 3.39116  | -0.04653 |
| C           | -4.27135 | 0.02586  | 0.00004  | C           | 5.15366  | 0.10322  | 0.00558  |
| H           | -3.02318 | 1.78270  | -0.00058 | H           | 4.03346  | 1.94357  | -0.05437 |
| C           | -5.59709 | -0.44056 | 0.00049  | C           | 6.44217  | -0.45644 | 0.04206  |
| H           | -5.79689 | -1.50572 | 0.00076  | H           | 6.56599  | -1.53265 | 0.06864  |
| H           | -7.67596 | 0.08060  | 0.00096  | H           | 8.55252  | -0.08402 | 0.07431  |
| C           | -3.16488 | -0.91808 | -0.00013 | C           | 3.98319  | -0.76023 | 0.00095  |
| C           | -3.05991 | -2.28296 | -0.00052 | C           | 3.78300  | -2.11560 | 0.00427  |
| N           | -1.73468 | -2.65236 | -0.00070 | N           | 2.43591  | -2.38997 | -0.00376 |
| H           | -3.84860 | -3.01766 | -0.00075 | H           | 4.51768  | -2.90422 | 0.01091  |
| C           | -1.07075 | -1.52663 | -0.00030 | C           | 1.85368  | -1.22049 | -0.01190 |
| O           | -1.88451 | -0.42538 | 0.00008  | O           | 2.74197  | -0.17953 | -0.01006 |
| C           | 0.31749  | -1.32350 | -0.00028 | C           | 0.48218  | -0.92188 | -0.02018 |
| C           | 1.51681  | -1.15450 | -0.00010 | C           | -0.70131 | -0.66997 | -0.02509 |
| C           | 2.92415  | -0.97705 | 0.00007  | C           | -2.09102 | -0.37943 | -0.02890 |
| C           | 3.75335  | -2.09232 | 0.00030  | C           | -3.03607 | -1.42174 | -0.02568 |
| C           | 5.15348  | -1.95166 | 0.00047  | C           | -4.39413 | -1.13593 | -0.02762 |
| H           | 3.30926  | -3.08017 | 0.00036  | H           | -2.69660 | -2.44968 | -0.02263 |
| C           | 5.72707  | -0.70129 | 0.00039  | C           | -4.82757 | 0.19131  | -0.03682 |
| H           | 5.77590  | -2.83878 | 0.00064  | H           | -5.11466 | -1.94379 | -0.02898 |
| C           | 4.92270  | 0.46781  | 0.00016  | C           | -3.89949 | 1.23495  | -0.03987 |
| H           | 6.80637  | -0.59265 | 0.00051  | C           | -2.54077 | 0.95388  | -0.03762 |
| C           | 3.49780  | 0.34221  | 0.00000  | H           | -4.23691 | 2.26361  | -0.05061 |
| C           | 2.70843  | 1.51946  | -0.00024 | H           | -1.81920 | 1.76096  | -0.04371 |
| C           | 3.29806  | 2.76265  | -0.00033 | C           | -6.29761 | 0.49984  | 0.01691  |
| H           | 1.62883  | 1.42856  | -0.00037 | F           | -7.04990 | -0.47400 | -0.54337 |
| C           | 4.70607  | 2.88926  | -0.00017 | F           | -6.60508 | 1.65444  | -0.61766 |
| H           | 2.67966  | 3.65306  | -0.00052 | F           | -6.73933 | 0.63777  | 1.29615  |
| C           | 5.49806  | 1.76640  | 0.00007  |             |          |          |          |
| H           | 5.15745  | 3.87482  | -0.00024 |             |          |          |          |
| H           | 6.57919  | 1.85585  | 0.00020  |             |          |          |          |

**Table S6. Optimized geometry in solvent (toluene) for compound 16f used to perform the calculation of the static ( $\beta_0$ ) and dynamic ( $\beta_{\text{HRS}}$ ) first hyperpolarizability  $\beta$  (in  $10^{-30}$  cm<sup>4</sup> statvolt<sup>-1</sup>). The values below correspond to the functional B3LYP with the basis set 6-311+G(d,p).**

| <b>Sample: 16f</b> |          |          |          |
|--------------------|----------|----------|----------|
| C                  | 5.89663  | 0.05356  | 0.00005  |
| C                  | 5.86291  | 1.44920  | 0.00019  |
| C                  | 4.63437  | 2.10826  | 0.00024  |
| H                  | 6.78653  | 2.01629  | 0.00025  |
| C                  | 3.44645  | 1.38329  | 0.00015  |
| H                  | 4.59903  | 3.19170  | 0.00034  |
| C                  | 3.47216  | -0.02037 | 0.00001  |
| H                  | 2.49562  | 1.90089  | 0.00019  |
| C                  | 4.71463  | -0.67701 | -0.00004 |
| H                  | 4.75669  | -1.75989 | -0.00014 |
| H                  | 6.84742  | -0.46697 | 0.00001  |
| C                  | 2.23857  | -0.79113 | -0.00008 |
| C                  | 1.93348  | -2.12628 | -0.00023 |
| N                  | 0.56856  | -2.29533 | -0.00026 |
| H                  | 2.60430  | -2.96989 | -0.00033 |
| C                  | 0.07932  | -1.08402 | -0.00012 |
| O                  | 1.04545  | -0.11543 | -0.00002 |
| C                  | -1.26563 | -0.68105 | -0.00009 |
| C                  | -2.42775 | -0.34385 | -0.00006 |
| C                  | -3.79089 | 0.04740  | -0.00001 |
| C                  | -4.82914 | -0.89875 | 0.00050  |
| C                  | -6.14179 | -0.44943 | 0.00053  |
| H                  | -4.59808 | -1.95697 | 0.00086  |
| C                  | -6.38281 | 0.92379  | 0.00006  |
| H                  | -6.96877 | -1.14893 | 0.00091  |
| N                  | -5.40720 | 1.84112  | -0.00044 |
| H                  | -7.39940 | 1.30471  | 0.00008  |
| C                  | -4.14810 | 1.41034  | -0.00047 |
| H                  | -3.37091 | 2.16820  | -0.00088 |

**Table S7: Theoretical values for static ( $\beta_0$ ) and dynamic ( $\beta_{\text{HRS}}$ ) first hyperpolarizability  $\beta$  (in  $10^{-30} \text{ cm}^4 \text{ statvolt}^{-1}$ ) in toluene medium of the investigated compounds. These results were obtained by using the basis set 6-311+G(d,p).**

| Molecule | B3LYP     |                      | CAM-B3LYP |                      | M06-2X    |                      | Experimental         |
|----------|-----------|----------------------|-----------|----------------------|-----------|----------------------|----------------------|
|          | $\beta_0$ | $\beta_{\text{HRS}}$ | $\beta_0$ | $\beta_{\text{HRS}}$ | $\beta_0$ | $\beta_{\text{HRS}}$ | $\beta_{\text{HRS}}$ |
| 8j       | 29.4      | 99.8                 | 12.2      | 24.5                 | 13.0      | 26.4                 | 42 ± 4               |
| 9k       | 18.9      | 45.5                 | 11.2      | 18.8                 | 11.0      | 18.3                 | 35 ± 4               |
| 10b      | 20.3      | 68.6                 | 12.4      | 24.3                 | 11.5      | 22.6                 | 34 ± 3               |
| 10d      | 8.5       | 25.6                 | 3.5       | 6.2                  | 4.3       | 8.2                  | 15 ± 2               |
| 11b      | 18.5      | 73.7                 | 7.9       | 17.7                 | 8.7       | 20.1                 | 30 ± 3               |
| 13k      | 24.4      | 82.2                 | 13.6      | 26.6                 | 12.3      | 23.6                 | 38 ± 4               |
| 16b      | 20.2      | 55.5                 | 11.7      | 20.5                 | 10.9      | 19.3                 | 29 ± 3               |
| 16c      | 54.0      | 187.7                | 23.3      | 48.7                 | 24.6      | 51.5                 | 48 ± 5               |
| 16d      | 11.9      | 40.0                 | 4.6       | 9.7                  | 5.7       | 12.1                 | 17 ± 2               |
| 16e      | 32.2      | 96.7                 | 14.0      | 28.4                 | 15.1      | 30.3                 | 31 ± 3               |
| 16f      | 21.8      | 61.8                 | 9.6       | 19.1                 | 10.2      | 20.4                 | 22 ± 2               |

**Table S8: Theoretical values for static ( $\beta_0$ ) and dynamic ( $\beta_{\text{HRS}}$ ) first hyperpolarizability  $\beta$  (in  $10^{-30} \text{ cm}^4 \text{ statvolt}^{-1}$ ) in toluene medium of the investigated compounds. These results were obtained by using the basis set 6-311++G(d,p).**

| Molecule | B3LYP     |                      | CAM-B3LYP |                      | M06-2X    |                      | Experimental         |
|----------|-----------|----------------------|-----------|----------------------|-----------|----------------------|----------------------|
|          | $\beta_0$ | $\beta_{\text{HRS}}$ | $\beta_0$ | $\beta_{\text{HRS}}$ | $\beta_0$ | $\beta_{\text{HRS}}$ | $\beta_{\text{HRS}}$ |
| 8j       | 29.2      | 99.5                 | 13.8      | 29.3                 | 14.5      | 31.3                 | 42 ± 4               |
| 9k       | 18.8      | 45.2                 | 13.2      | 21.4                 | 12.0      | 20.9                 | 35 ± 4               |
| 10b      | 20.1      | 68.1                 | 13.7      | 28.6                 | 12.8      | 26.9                 | 34 ± 3               |
| 10d      | 8.4       | 25.6                 | 4.1       | 8.1                  | 5.0       | 10.4                 | 15 ± 2               |
| 11b      | 18.4      | 73.7                 | 9.0       | 22.3                 | 9.7       | 24.6                 | 30 ± 3               |
| 13k      | 24.4      | 81.8                 | 15.6      | 32.7                 | 14.8      | 31.0                 | 38 ± 4               |
| 16b      | 20.0      | 51.1                 | 12.7      | 23.5                 | 11.9      | 22.0                 | 29 ± 3               |
| 16c      | 54.0      | 187.7                | 28.1      | 62.9                 | 29.7      | 66.6                 | 48 ± 5               |
| 16d      | 11.9      | 40.0                 | 5.5       | 12.6                 | 6.6       | 15.0                 | 17 ± 2               |
| 16e      | 32.2      | 96.7                 | 17.2      | 36.8                 | 18.7      | 39.8                 | 31 ± 3               |
| 16f      | 21.8      | 61.8                 | 11.3      | 23.9                 | 11.9      | 25.0                 | 22 ± 2               |

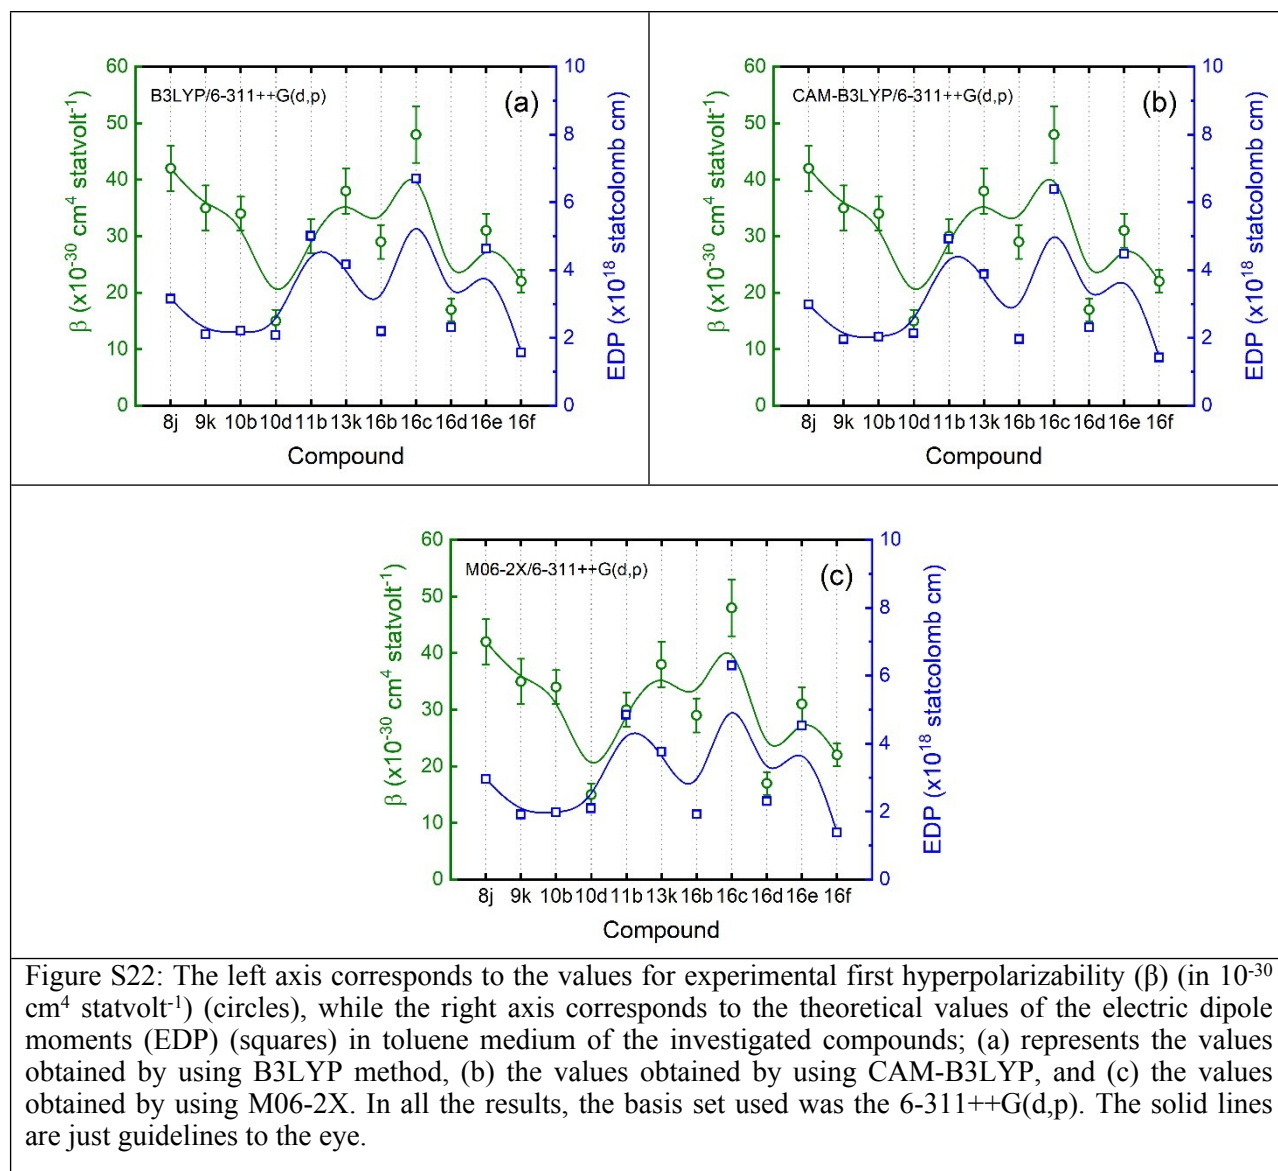

Figure S22: The left axis corresponds to the values for experimental first hyperpolarizability ( $\beta$ ) (in  $10^{-30} \text{ cm}^4 \text{ statvolt}^{-1}$ ) (circles), while the right axis corresponds to the theoretical values of the electric dipole moments (EDP) (squares) in toluene medium of the investigated compounds; (a) represents the values obtained by using B3LYP method, (b) the values obtained by using CAM-B3LYP, and (c) the values obtained by using M06-2X. In all the results, the basis set used was the 6-311++G(d,p). The solid lines are just guidelines to the eye.
